# Supplementary material
Source: publisher site journal article supplement (https://www.dovepress.com/article/474154)
Supplement: Supplementary file 1 [file get_supplementary_file.php]

**Table S1. Associations between inflammatory indicators in the second and third trimesters and gestational diabetes mellitus**

|  | **Unadjusted** | | |  | **Full-adjusted** | | |
| --- | --- | --- | --- | --- | --- | --- | --- |
|  | **OR (95% CI)** | **P value** | **AUC** |  | **OR (95% CI)** | **P value** | **AUC** |
| **SII in the second trimester**a |  |  |  |  |  |  |  |
| Continuous value, per 1011/L increase | 1.036 (1.025, 1.047) | <0.001 | 0.542 |  | 1.028 (1.017, 1.040) | <0.001 | 0.67 |
| quartiles, referring to Q1 |  |  | 0.54 |  |  |  | 0.67 |
| Q2 | 1.174 (1.045, 1.319) | 0.007 |  |  | 1.133 (1.004, 1.277) | 0.043 |  |
| Q3 | 1.278 (1.139, 1.434) | <0.001 |  |  | 1.203 (1.068, 1.356) | 0.002 |  |
| Q4 | 1.491 (1.332, 1.669) | <0.001 |  |  | 1.384 (1.230, 1.557) | <0.001 |  |
| **SIRI in the second trimester**b |  |  |  |  |  |  |  |
| Continuous value, per 109/L increase | 1.089 (1.055, 1.124) | <0.001 | 0.53 |  | 1.105 (1.069, 1.142) | <0.001 | 0.671 |
| quartiles, referring to Q1 |  |  | 0.526 |  |  |  | 0.671 |
| Q2 | 1.115 (0.994, 1.251) | 0.062 |  |  | 1.112 (0.988, 1.253) | 0.005 |  |
| Q3 | 1.145 (1.022, 1.284) | 0.02 |  |  | 1.163 (1.033, 1.310) | <0.001 |  |
| Q4 | 1.310 (1.171, 1.466) | <0.001 |  |  | 1.391 (1.237, 1.564) | <0.001 |  |
| **SII in the third trimester**a |  |  |  |  |  |  |  |
| Continuous value, per 1011/L increase | 0.975 (0.963, 0.986) | <0.001 | 0.526 |  | 0.969 (0.957, 0.982) | <0.001 | 0.669 |
| quartiles, referring to Q1 |  |  | 0.521 |  |  |  | 0.669 |
| Q2 | 0.976 (0.875, 1.089) | 0.660 |  |  | 0.952 (0.850, 1.067) | 0.397 |  |
| Q3 | 0.836 (0.748, 0.936) | 0.002 |  |  | 0.806 (0.718, 0.906) | <0.001 |  |
| Q4 | 0.845 (0.755, 0.944) | 0.003 |  |  | 0.803 (0.715, 0.902) | <0.001 |  |
| **SIRI in the third trimester**b |  |  |  |  |  |  |  |
| Continuous value, per 109/L increase | 0.848 (0.821, 0.877) | <0.001 | 0.561 |  | 0.864 (0.835, 0.894) | <0.001 | 0.674 |
| quartiles, referring to Q1 |  |  | 0.555 |  |  |  | 0.674 |
| Q2 | 0.800 (0.719, 0.890) | <0.001 |  |  | 0.793 (0.710, 0.887) | <0.001 |  |
| Q3 | 0.681 (0.610, 0.760) | <0.001 |  |  | 0.692 (0.618, 0.776) | <0.001 |  |
| Q4 | 0.586 (0.523, 0.656) | <0.001 |  |  | 0.620 (0.551, 0.697) | <0.001 |  |

**Notes:** Logistic models were constructed, including the unadjusted model, and the fully adjusted model (including age, education, monthly income, smoking, alcohol consumption, previous pregnancies, previous pregnancy complications, BMI before pregnancy, blood pressure, fasting plasma glucose, and triglyceride in the first trimester). aSII=P×N/L, where P indicates platelets, N indicates neutrophils, and L indicates lymphocytes. bSIRI=N×M/L, where N indicates neutrophils, M indicates monocytes, and L indicates lymphocytes.

**Abbreviations:** AUC, area under the curve; CI, confidence interval; OR, odds ratio; SII, systemic immune-inflammation index; SIRI, systemic inflammation response index.

**Table S2. Baseline characteristics of matched population, group by gestational diabetes mellitus**

|  | **Overall** | **GDM** | **Non-GDM** | **SMD**a |
| --- | --- | --- | --- | --- |
| Number of participants | 7124 | 3562 | 3562 |  |
| Age, years, mean (SD) | 30.2 (3.9) | 30.5 (3.9) | 29.9 (3.9) | 0.1515 |
| College and above, n (%) | 5250 (73.7) | 2658 (74.6) | 2592 (72.8) | 0.0421 |
| Monthly income ≥ 9000 yuan, n (%) | 3456 (48.5) | 1698 (47.7) | 1758 (49.4) | -0.0337 |
| Smoking, n (%) | 159 (2.2) | 82 (2.3) | 77 (2.2) | 0.0095 |
| Drinking, n (%) | 980 (13.8) | 526 (14.8) | 454 (12.7) | 0.0587 |
| Prepregnancy BMIb, kg/m2, mean (SD) | 21.6 (2.9) | 21.7 (2.9) | 21.5 (2.9) | 0.0613 |
| BMI at baselineb, kg/m2, mean (SD) | 21.9 (3) | 22.1 (3) | 21.7 (3) | 0.1036 |
| Information of previous pregnancies, n (%) |  |  |  |  |
| Previous pregnancies | 4099 (57.5) | 2010 (56.4) | 2089 (58.6) | -0.0449 |
| Previous births | 3003 (42.2) | 1429 (40.1) | 1574 (44.2) | -0.0825 |
| Previous gestational complications | 382 (5.4) | 199 (5.6) | 183 (5.1) | 0.0199 |
| Clinical measures, mean (SD) |  |  |  |  |
| Gestational age at baseline, week | 11.1 (1.2) | 11.1 (1.1) | 11.1 (1.2) | -0.0254 |
| SBP, mmHg | 115.1 (11) | 115.3 (11.3) | 115 (10.8) | 0.0306 |
| DBP, mmHg | 69.6 (11.4) | 69.9 (13.7) | 69.4 (8.6) | 0.0414 |
| FPG, mg/dL | 4.8 (0.4) | 4.8 (0.4) | 4.8 (0.4) | 0.0802 |
| TG, mmol/L | 1.4 (0.5) | 1.5 (0.6) | 1.4 (0.5) | 0.0666 |
| TC, mmol/L | 4.7 (0.7) | 4.7 (0.8) | 4.7 (0.7) | 0.0731 |
| LDL-C, mmol/L | 2.5 (0.6) | 2.5 (0.6) | 2.4 (0.6) | 0.0612 |
| HDL-C, mmol/L | 1.7 (0.3) | 1.7 (0.3) | 1.6 (0.3) | 0.0426 |
| Complete blood count, mean (SD) |  |  |  |  |
| Platelet, 109/L | 247.4 (51.8) | 248.6 (51.5) | 246.2 (51.9) | 0.0465 |
| Neutrophil, 109/L | 6.2 (1.7) | 6.4 (1.7) | 6.1 (1.6) | **0.2050** |
| Lymphocyte, 109/L | 1.9 (0.5) | 1.9 (0.5) | 1.9 (0.5) | 0.0630 |
| Monocyte, 109/L | 0.5 (0.1) | 0.5 (0.2) | 0.5 (0.1) | 0.1018 |

**Notes:** aStandardized mean difference (SMD) is computed to compare characteristics between participants with GDM and without GDM. Absolute SMDs of 0.2, 0.5, and 0.8 represent small, medium, and large differences, respectively. Absolute SMD values greater than or equal to 0.2 are highlighted in bold. bBMI=weight (kg)/(height [m])2.

**Abbreviations:** BMI, body mass index; DBP, diastolic blood pressure; FPG, fasting plasma glucose; GDM, gestational diabetes mellitus; HDL-C, high-density lipoprotein cholesterol; LDL-C, low-density lipoprotein cholesterol; SBP, systolic blood pressure; SD, standardized deviation; SMD, standardized mean difference; TC, total cholesterol; TG, triglyceride.

**Table S3. Blood cell counts and inflammatory indicators across trimesters of pregnancy among the matched population**

|  | **First trimester** | | |  | **Second trimester** | | |  | **Third trimester** | | |
| --- | --- | --- | --- | --- | --- | --- | --- | --- | --- | --- | --- |
|  | **GDM** | **Non-GDM** | **SMD**a |  | **GDM** | **Non-GDM** | **SMD**a |  | **GDM** | **Non-GDM** | **SMD**a |
| **Complete blood count, 109/L, mean (SD)** | | | |  |  |  |  |  |  |  |  |
| Platelet | 248.5 (51.6) | 246.3 (51.7) | 0.042 |  | 229.7 (49.8) | 228.4 (49.8) | 0.026 |  | 211.8 (50.2) | 215 (50.8) | -0.064 |
| Neutrophil | 6.4 (1.7) | 6 (1.6) | 0.211 |  | 7.5 (1.9) | 7.3 (1.9) | 0.135 |  | 6.8 (1.8) | 7.2 (1.9) | -0.179 |
| Lymphocyte | 1.9 (0.5) | 1.9 (0.5) | 0.076 |  | 1.9 (0.5) | 1.9 (0.5) | -0.015 |  | 1.8 (0.5) | 1.9 (0.5) | -0.094 |
| Monocyte | 0.5 (0.2) | 0.5 (0.1) | 0.105 |  | 0.6 (0.2) | 0.6 (0.2) | 0.083 |  | 0.7 (0.2) | 0.7 (0.2) | -0.195 |
| **Inflammatory indicators, median (IQR)** | | | |  |  |  |  |  |  |  |  |
| SII, 109/L | 814.6 (624.9, 1031.1) | 771.8 (596, 1004.7) | 0.100 |  | 871.2 (691.3, 1102.3) | 837.3 (657.7, 1055.4) | 0.116 |  | 778.3 (610.7, 999.5) | 805.4 (625.1, 1040.7) | -0.092 |
| SIRI, 109/L | 1.6 (1.2, 2.2) | 1.5 (1.1, 2) | 0.142 |  | 2.3 (1.7, 3) | 2.1 (1.6, 2.9) | 0.129 |  | 2.4 (1.8, 3.2) | 2.6 (1.9, 3.4) | -0.167 |
| NLR | 3.3 (2.7, 4.1) | 3.2 (2.6, 4) | 0.099 |  | 3.9 (3.2, 4.7) | 3.7 (3.1, 4.5) | 0.121 |  | 3.8 (3.1, 4.6) | 3.9 (3.2, 4.7) | -0.061 |
| PLR | 130.8 (109.5, 156.2) | 131.8 (110.4, 159) | -0.043 |  | 119.2 (100, 141.8) | 117.9 (99.3, 140.3) | 0.021 |  | 117.5 (97, 140.9) | 116.1 (96.3, 140.2) | 0.030 |
| LMR | 3.9 (3.2, 4.7) | 3.9 (3.2, 4.8) | -0.035 |  | 3.2 (2.6, 3.9) | 3.3 (2.7, 4) | -0.084 |  | 2.8 (2.3, 3.4) | 2.7 (2.2, 3.3) | 0.117 |

**Notes:** The analyses were performed on 6074 participants (GDM:3001, non-GDM:3073) who had CBC tests in all three trimesters. aStandardized mean difference (SMD) is computed to compare blood cell counts and inflammatory indicators between participants with GDM and without GDM, and an absolute value of SMD smaller than 0.2 can be interpreted as a small difference.

**Abbreviations:** GDM, gestational diabetes mellitus; IQR, interquartile range; LMR, lymphocyte-to-monocyte ratio; NLR, neutrophil-to-lymphocyte ratio; PLR, platelet-to-lymphocyte ratio; SD, standardized deviation; SII, systemic immune inflammation index; SIRI, system inflammation response index; SMD, standardized mean difference.

**Table S4. Inflammatory indicators in the first trimester and gestational diabetes mellitus among the matched population**

|  | **Unadjusted** | |  | **Full-adjusted** | |
| --- | --- | --- | --- | --- | --- |
|  | **OR (95% CI)** | **P value** |  | **OR (95% CI)** | **P value** |
| **SII in the first trimester** | | |  |  |  |
| Continuous value, per 1011/L increase | 1.032 (1.018, 1.046) | <0.001 |  | 1.026 (1.011, 1.041) | <0.001 |
| quartiles, referring to Q1 |  |  |  |  |  |
| Q2 | 1.118 (0.980, 1.276) | 0.098 |  | 1.079 (0.934, 1.246) | 0.300 |
| Q3 | 1.332 (1.167, 1.521) | <0.001 |  | 1.252 (1.085, 1.444) | 0.002 |
| Q4 | 1.325 (1.160, 1.515) | <0.001 |  | 1.263 (1.093, 1.458) | 0.002 |
| **SIRI in the first trimester** | | |  |  |  |
| Continuous value, per 109/L increase | 1.196 (1.148, 1.247) | <0.001 |  | 1.165 (1.095, 1.240) | <0.001 |
| quartiles, referring to Q1 |  |  |  |  |  |
| Q2 | 1.240 (1.113, 1.382) | 0.172 |  | 1.124 (0.972, 1.299) | 0.115 |
| Q3 | 1.437 (1.292, 1.598) | <0.001 |  | 1.359 (1.175, 1.573) | <0.001 |
| Q4 | 1.550 (1.395, 1.722) | <0.001 |  | 1.375 (1.187, 1.594) | <0.001 |

**Notes:** Logistic models were constructed, including the unadjusted model, and the fully adjusted model (including age, education, monthly income, smoking, alcohol consumption, previous pregnancies, previous pregnancy complications, BMI before pregnancy, blood pressure, fasting plasma glucose, and triglyceride in the first trimester).

**Abbreviations:** CI, confidence interval; OR, odds ratio; SII, systemic immune-inflammation index; SIRI, systemic inflammation response index.

**Table S5. Inflammatory indicators and blood cell counts during pregnancy in the NHANES population**

|  | **Unweighted population** | | |  | **Weighted population** | | |
| --- | --- | --- | --- | --- | --- | --- | --- |
|  | **first trimester** | **second trimester** | **third trimester** |  | **first trimester** | **second trimester** | **third trimester** |
| Number of populations | 134 | 346 | 150 |  | 572865.29 | 955798.03 | 545490.33 |
| **Complete blood count, 109/L, median (IQR)** | | | |  |  |  |  |
| Platelet | 259.0 (218.0, 300.2) | 250.5 (213.2, 294.0) | 230.5 (200.0, 265.0) |  | 255.4 (204.9, 285.0) | 242.4 (211.0, 281.9) | 220.2 (184.3, 265.0) |
| Neutrophil | 5.6 (4.2, 7.1) | 7.1 (5.8, 8.2) | 6.9 (5.8, 8.3) |  | 5.6 (4.6, 7.2) | 7.0 (6.0, 8.2) | 6.9 (5.8, 7.7) |
| Lymphocyte | 1.9 (1.6, 2.5) | 1.8 (1.6, 2.2) | 1.7 (1.5, 2.1) |  | 1.9 (1.7, 2.34 | 1.8 (1.5, 2.2) | 1.7 (1.4, 2.0) |
| Monocyte | 0.5 (0.4, 0.6) | 0.6 (0.5, 0.7) | 0.6 (0.5, 0.7) |  | 0.5 (0.5, 0.7) | 0.6 (0.5, 0.7) | 0.6 (0.5, 0.8) |
| **Inflammatory indicators, 109/L, median (IQR)** | | | |  |  |  |  |
| SII | 699.4 (539.8, 954.1) | 959.0 (722.7, 1226.9) | 919.1 (688.7, 1192.7) |  | 747.2 (547.6, 887.1) | 978.3 (710.8, 1227.9) | 861.7 (617.9, 1172.0) |
| SIRI | 1.46 (0.98, 2.15) | 2.13 (1.63, 2.91) | 2.53 (1.82, 3.34) |  | 1.57 (1.14, 2.22) | 2.20 (1.60, 3.15) | 2.56 (1.84, 3.50) |

**Abbreviations:** IQR, interquartile range; SII, systemic immune-inflammation index; SIRI, systemic inflammation response index.


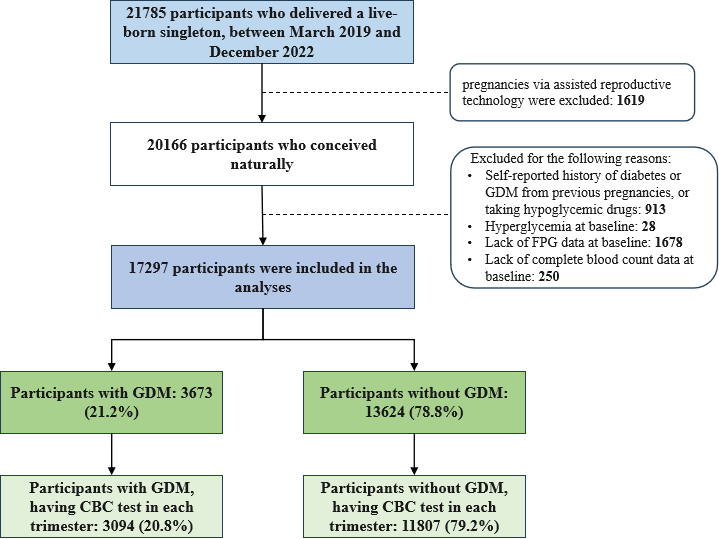


**Figure S1. Study flowchart.**

**Abbreviations:** CBC, complete blood count; FPG, fasting plasma glucose; GDM, gestational diabetes mellitus.
